# Supplementary material for: Limitations of the human iPSC-derived neuron model for early-onset Alzheimer’s disease
Source: PubMed Central journal article supplement (PMC10623777; doi:10.1186/s13041-023-01063-5), 2023-11-03

A

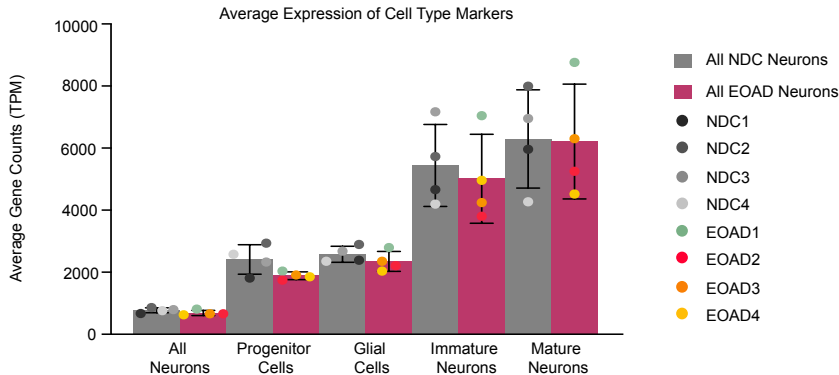

B

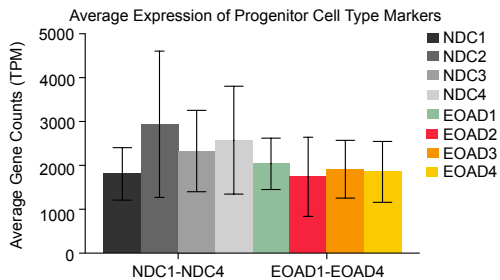

C

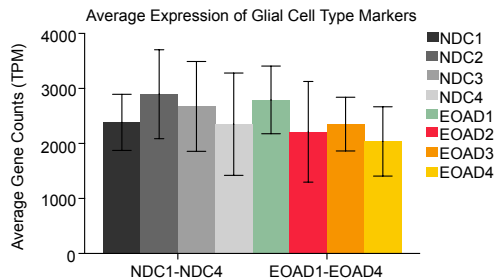

D

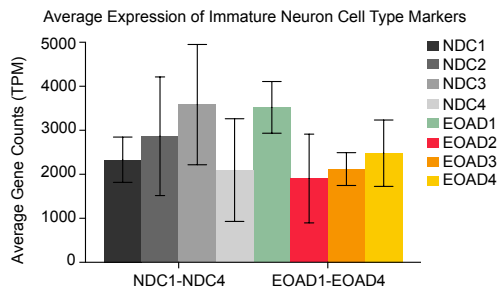

E

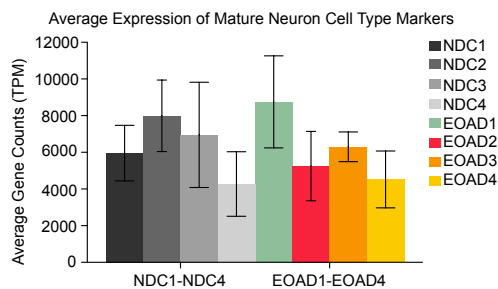

F

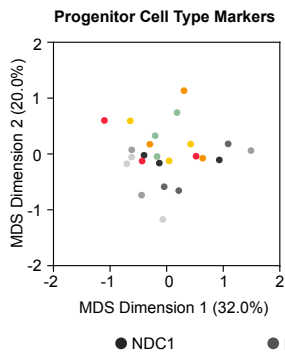

G

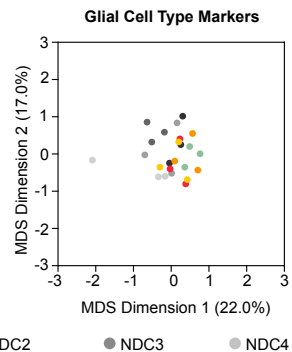

H

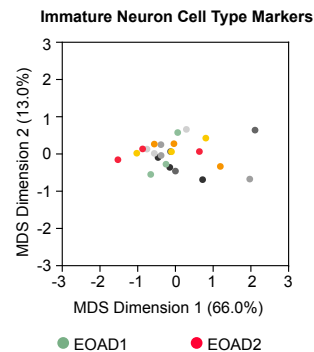

I

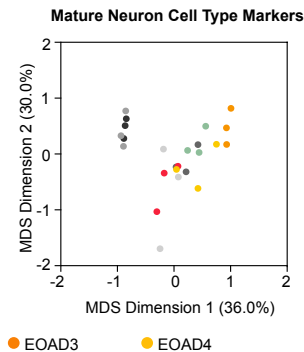

**A** EOAD and NDC Progenitor Cell Type Marker Subtypes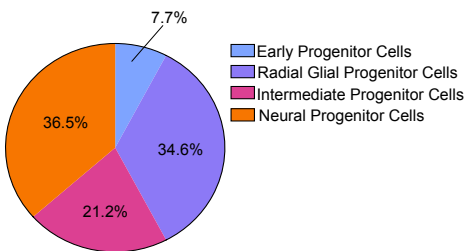**B** EOAD and NDC Glial Cell Type Marker Subtypes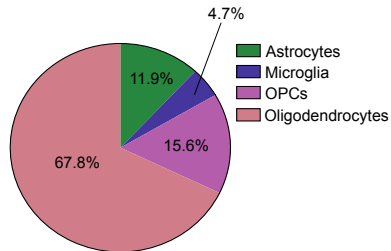**C** EOAD and NDC Neuron Cell Type Marker Subtypes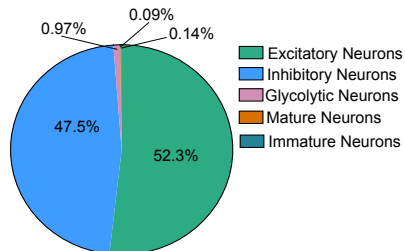**D** Average Expression of Neural Progenitor Cell Type Markers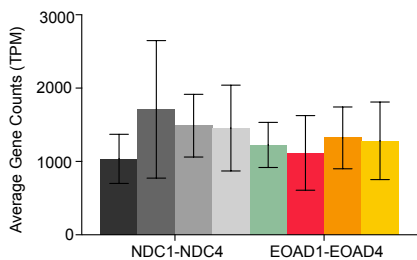**E** Average Expression of Oligodendrocyte Cell Type Markers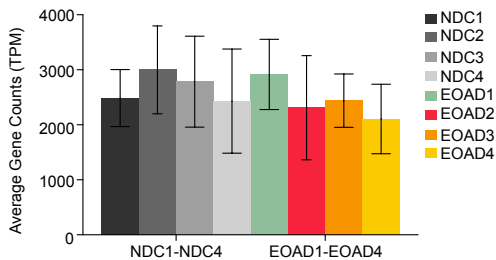**F** Average Expression of Excitatory Neuron Cell Type Markers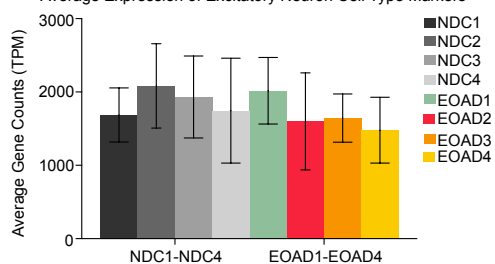**G** Average Expression of Inhibitory Neuron Cell Type Markers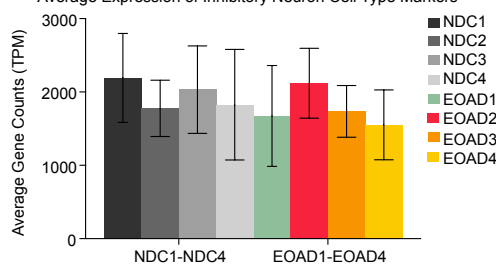**H** Neural Progenitor Cell Type Markers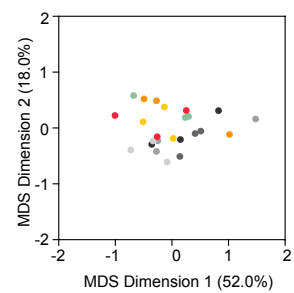**I** Oligodendrocytes Cell Type Markers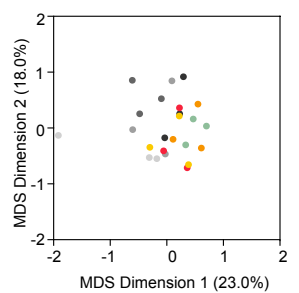**J** Excitatory Neuron Cell Type Markers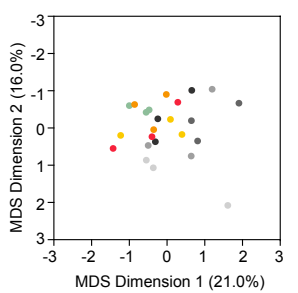**K** Inhibitory Neuron Cell Type Markers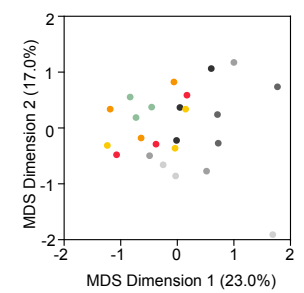

● NDC1 ● NDC2 ● NDC3 ● NDC4

● EOAD1 ● EOAD2 ● EOAD3 ● EOAD4

A

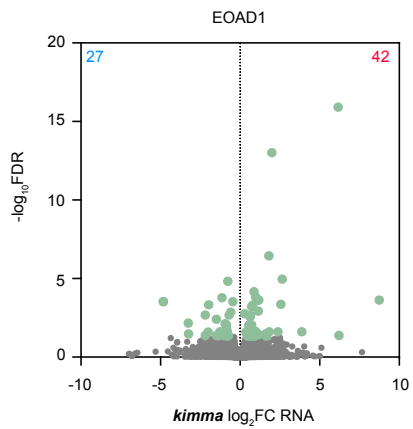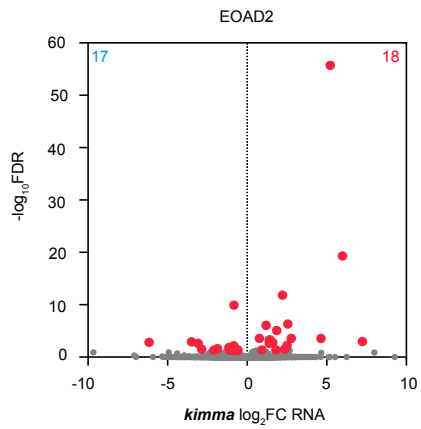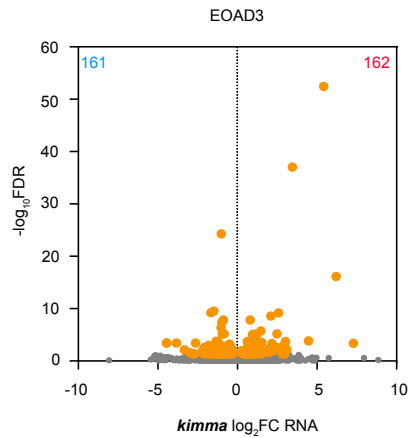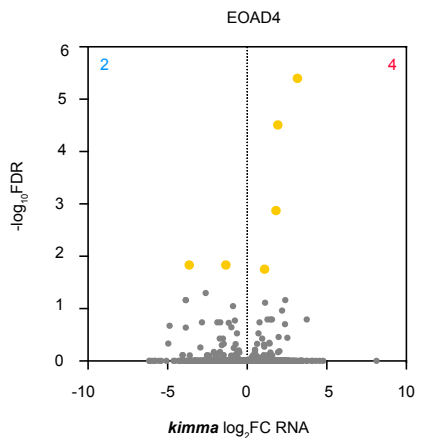

Supplement: 13041_2023_1063_MOESM1_ESM.pdf [file 13041_2023_1063_MOESM1_ESM.pdf]
